# Supplementary material for: The human bitter taste receptor T2R38 is broadly tuned for bacterial compounds
Source: PLoS One. 2017 Sep 13;12(9):e0181302. doi: 10.1371/journal.pone.0181302 (PMC5597121; doi:10.1371/journal.pone.0181302)
Supplement: S1 Table — (XLSX) [file pone.0181302.s008.xlsx]

## Sheet: Fig 1
experiment	1	1	2	2	3	3
	T2R38	empty vector	T2R38	empty vector	T2R38	empty vector
DMSO 1.5%	0.0438521	0.0151332	0.073949	0.0050905	0.0724954	0.00831716
	0.0249104	0.00759761	0.0484598	0.00966521	0.072799	0.00336826
HSL-C12 (1mM in DMSO 1.5%)	0.0851023	0.00923908	0.0339886	0.0151315	0.0812177	0.014012
	0.0546994	0.00477874	0.0484295	0.00966184	0.0974326	0.0305426
HSL-C4 (2mM in DMSO 1.5%)	0.0692485	0.00559858	0.0347667	0.0181506	0.0597282	0.0105509
	0.0236425	0.00362791	0.095639	0.003276	0.0446325	0.00978294
HSL-C4 2mM	0.00380159	0.00076555	0.00934579	0.020716	0.00335425	0.00349307
	0.00530529	0.00324799	0.0010569	0.00649106	0.00168695	0.00129774
HSL-C12 (1mM in EtOH 2%)	0.0204044	0.00581799	0.019194	0.0702774	0.0133221	0.0223129
	0.0451008	0.0290357	0.0583074	0.0538426	0.030852	0.002849
HSL-C4 (2mM in EtOH 0,4%)	0.002746	0.00395944	0.0194664	0.00685845	0.0220588	0.00427507
	0.00238748	0.00556889	0.0028797	0.0148618	0.0129397	0.00675344
PTC 0.1 mM	0.199509	0.00284846	0.164878	0.00404118	0.115331	0.00642236
	0.185965	0.00326014	0.201544	0.0102584	0.155728	0.00262055

## Sheet: Fig 2
	experiment	1	1	2	2	3	3	1	2	3
DMSO (M)	log [DMSO] (M)	T2R38	T2R38	T2R38	T2R38	T2R38	T2R38	empty vector	empty vector	empty vector
0.417313	-0.379538	0.0464193	0.146915	0.098808	0.0490985	0.278828	0.320865	0.0136789	0.0154676	0.0251987
0.388101	-0.411055	0.0716762	0.0907748	0.0658211	0.065925	0.195177	0.38581	0.0217854	0.0266298	0.00892514
0.283773	-0.547029	0.131019	0.0887574	0.0473886	0.0681588	0.149506	0.354918	0.0554306	0.0260529	0.00604482
0.208656	-0.680568	0.0889271	0.0672045	0.0739264	0.081146	0.219126	0.261973	0.0120518	0.0119865	0.0144252
0.161577	-0.791621	0.0179364	0.0305757	0.0236349	0.0440574	0.125928	0.240532	0.00220645	0.00503626	0.00478194
0.113804	-0.943844	0.0054155	0.0170971	0.0104177	0.0237374	0.0419474	0.112198	0.00568559	0.00367548	0.00193763
0.0660305	-1.18026	0.00576092	0.0276102	0.0405644	0.0123408	0.063624	0.020843	0.00284468	0.00794941	0.0105345
0.0505834	-1.29599	0.00623583	0.0116536	0.0106622	0.0206186	0.010651	0.0244442	0.00457112	0.00976723	0.00619486
0.0208957	-1.67994	0.0031679	0.0100108	0.00124509	0.030233	0.0104371	0.00836056	0.000544563	0.000997407	0.000456538
PTC 0.1 mM		0.140406	0.119457	0.078179	0.0477164	0.228549	0.42816	0.000576147	0.00238911	0.00215792

## Sheet: Fig_4
experiment		1	1	1	1	2	2	2	2	3	3	3	3	4	4	4	4
2 méthyl propanal	log10[ ]	T2R38	T2R38	empty vector	empty vector	T2R38	T2R38	empty vector	empty vector	T2R38	T2R38	empty vector	empty vector	T2R38	T2R38	empty vector	empty vector
0.0251189	-1.6	0.104407	0.254549	0.00786034	0.0265454	0.493186	0.579244	0.0655213	0.127435	0.53406	0.567626	0.0483066	0.0718373	0.343384	0.359896	0.0990903	0.101349
0.0158489	-1.8	0.237567	0.325567	0.0110613	0.0131862	0.401891	0.339268	0.036453	0.0514479	0.361895	0.28818	0.0185954	0.00333453	0.265686	0.241215	0.0241839	0.0327869
0.01	-2	0.232104	0.206221	0.00420706	0.0105487	0.243905	0.283061	0.0119432	0.00789905	0.24462	0.0641996	0.00732827	0.00272306	0.175991	0.128389	0.00893638	0.0137677
0.00630957	-2.2	0.0733279	0.0525876	0.00588506	0.00252672	0.155844	0.222826	0.00340974	0.00853308	0.151387	0.0307377	0.00348826	0.00629111	0.0815317	0.0600839	0.00238687	0.000622554
0.00398107	-2.4	0.0280115	0.0307128	0.00132739	0.00416089	0.0893662	0.166285	0.00479899	0.00873228	0.0402672	0.0612505	0.0033451	0.00262148	0.00770713	0.036709	0.00117668	0.00413983
0.00251189	-2.6	0.0150309	0.0117577	0.0149051	0.0117971	0.0546326	0.0492546	0.00305992	0.00373448	0.0161695	0.00537215	0.00282761	0.00646533	0.0221887	0.0186835	0.0025413	0.00230658
0.000398107	-3.4	0.0138862	0.0059765	0.00253974	0.00370587	0.0113187	0.0116325	x	0.00614284	0.00288989	0.00952759	0.00753445	0.00865084	0.00856299	0.00394338	0.00244366	0.0023344
PTC 0.1 mM		0.191592		0.00717762		0.385558		0.0054957		0.352648		0.00326998		0.172613		0.00277822
experiment		1	1	1	1	2	2	2	2	3	3	3	3
2 butanone	log10[ ]	T2R38	T2R38	empty vector	empty vector	T2R38	T2R38	empty vector	empty vector	T2R38	T2R38	empty vector	empty vector
0.08	-1.09691	0.196455	0.137466	0.034761	0.0122784	0.124965	0.132099	0.00221586	0.0103764	0.0512056	0.0615339	0.00254602	0.00753769
0.03	-1.52288	0.184396	0.198599	0.00270514	0.00404078	0.0934042	0.0853212	0.000815291	0.00247004	0.056951	0.0450683	0.000659382	0.000203604
0.015	-1.82391	0.0840488	0.139216	0.00306832	0.00177061	0.0572107	0.113313	0.00330063	0.00260151	0.0313804	0.0158859	0	0.00035202
0.005	-2.30103	0.0787526	0.0610927	0.00337068	0.00205255	0.0207682	0.0311843	0.00236759	0.00714972	0.00541126	0.00831164	0.00202572	0.00264309
0.001	-3	0.0315839	0.0322492	0.00354803	0.00121642	0.00147942	0.00216392	0.0102488	0.00243902	0.00133566	0.019802	0.00154131	0.00209186
0.0003	-3.52288	0.00438429	0.00213378	0.00276804	0.00312343	0	0.00145468	0.00228027	0.00398623	0.00294857	0.00342395	0.0039278	0.000963729
PTC 0.1 mM		0.25651		0.00504789		0.253805		0.00610582		0.297031		0.000779698
experiment		1	1	1	1	2	2	2	2	3	3	3	3
2 pentanone	log10[ ]	T2R38	T2R38	empty vector	empty vector	T2R38	T2R38	empty vector	empty vector	T2R38	T2R38	empty vector	empty vector
0.02	-1.69897	0.132786	0.16346	0.00536315	0.0113167	0.118771	0.0648858	0.00151908	0.00520883	0.0553552	0.0717279	0.0017635	0.00240015
0.006	-2.22185	0.100167	0.0961084	0.00188917	0.00291868	0.0552619	0.0537923	0.00621293	0.0032625	0.0540641	0.0474104	0.00273357	0.0125134
0.003	-2.52288	0.0819466	0.0988405	0.00311952	0.000580215	0.025939	0.0158316	0.00218188	0.000740192	0.0205404	0.0393709	0.000314729	0.00412223
0.001	-3	0.0533488	0.0348426	0.00172629	0.0013788	0.0103143	0.00209992	0.00643501	0.000571646	0.016685	0.00992083	0.000401687	0.0105585
0.0001	-4	0.0115405	0.00535767	0.00319372	0.00158384	0.00106562	9.19202e-05	0.00350711	0.00407158	0.00183824	0.00107354	0.00193255	0.00337806
PTC 0.1 mM		0.25651		0.00504789		0.253805		0.00610582		0.226815		0.00260127
experiment		1	1	1	2	2	2	3	3	3	3
acetone	log10[ ]	T2R38	T2R38	empty vector	T2R38	T2R38	empty vector	T2R38	T2R38	empty vector	empty vector
0.185117	-0.732554	not tested	not tested	not tested	0.27939	0.184427	0.000198768	0.0966811	0.119213	0.000453515	0.000283072
0.161725	-0.791621	0.0860602	0.0701809	0.00725718	0.119105	0.130326	9.55749e-05	0.0694787	0.179996	0.0103814	0.00216145
0.113908	-0.943844	0.05841	0.0445202	0.00377161	0.155164	0.206556	0.00111313	0.114734	0.0716054	0.00759294	0.000502008
0.066091	-1.17986	0.0265623	0.0293965	0.00695154	not tested	not tested	not tested	0.0689162	0.0970334	0.0143184	0.00297848
0.0351595	-1.45396	0.00691268	0.00808446	0.0102062	0.0795071	0.0558846	0.000982029	0.0213406	0.0279877	0.00263325	0.00424028
0.0111082	-1.95436	0.0102403	0.00774966	0.00486713	0.00775773	0.00461998	0.000624415	0.0116922	0.00984272	0.00323479	0.00076314
0.00351269	-2.45436	not tested	not tested	not tested	0.00289799	0.0015625	0.00579092	0.00286533	0.00347613	0.0126342	0.00397891
PTC 0.1 mM		0.0629477		0.00238911	0.328355		0.00215792	0.232079		0.00594472
experiment		1	1	1	1	2	2	2	2	3	3	3	3	4	4	4	4	5	5	5	5
g-butyrolactone	log10[ ]	T2R38	T2R38	empty vector	empty vector	T2R38	T2R38	empty vector	empty vector	T2R38	T2R38	empty vector	empty vector	T2R38	T2R38	empty vector	empty vector	T2R38	T2R38	empty vector	empty vector
0.1	-1	0.0367936	0.0504841	0.00712521	0.000990099	0.030093	0.0490532	0.00387034	0.0042654	0.0512299	0.0411546	0.00608192	0.00241568	0.0549595	0.0880336	0.00233558	0.00191728	0.107124	0.110848	0.000337895	0.002648
0.0467735	-1.33	0.0676522	0.0710356	0.0125313	0.00146991	0.0893613	0.0861845	0.00203271	0.00233995	0.113916	0.140495	0.00154293	0.00322336	0.108679	0.0938067	0.000824553	0.00541324	0.131673	0.146865	0.00266544	0.00247434
0.0218776	-1.66	0.0447653	0.029218	0.00204499	0.00282433	0.0470385	0.0410996	0.00224949	0.00265353	0.120433	0.121457	0.00702463	0.00243441	0.105798	0.0372722	0.00358254	0.00962861	0.126281	0.0699742	0.000736648	0.000522648
0.01	-2	0.0180199	0.0165816	0.00116991	0.00419094	0.00813008	0.0230399	0.00361141	0.00642398	0.0301109	0.0355383	artefact	0.00280983	0.0134935	0.0255037	0.00159968	0.000869649	0.0373967	0.0670231	0.000196309	0.00880098
0.00467735	-2.33	0.00500417	0.0103362	0.00197931	0.00591998	artefact	artefact	0.00336534	0.0037565	0.00744325	0.016079	0.0039579	0.00724786	0.00556061	0.00679468	0.00353053	0.000294695	0.0170225	0.00370611	0.00128464	0.00395517
0.00218776	-2.66	0.00671551	0.00708229	0.00152269	0.00662628	0.00240281	0.00227173	0.00130487	0.00623853	0.00724085	0.00328947	0.00568451	0.00297562	0.00213675	0.00141603	0.00517936	0.00169603	0.00371311	0.00240496	0.00324476	0.00321217
0.001	-3	0.0125973	0.00401955	0.00173377	0.0029809	0.0110938	0.000858074	0.00100432	0.00102438	0.000919033	0.00259813	0.00385477	0.002568	0.000772574	0.00211353	0.0023336	0.00199601	0.00294695	0.00123533	0.000274901	0.000693782
PTC 0.1 mM		0.191592		0.00717762		0.292466		0.00549779		0.172613		0.00277822		0.315894		0.00208106		0.302612		0.00477751
experiment		1	1	1	1	2	2	2	2	3	3	3	3	4	4	4	4	5	5	5	5	6	6
dimethyldisulfide	log10[ ]	T2R38	T2R38	empty vector	empty vector	T2R38	T2R38	empty vector	empty vector	T2R38	T2R38	empty vector	empty vector	T2R38	T2R38	empty vector	empty vector	T2R38	T2R38	empty vector	empty vector	T2R38	T2R38
0.00398107	-2.4	0.0638278	0.0545385	0.00435878	0.00184664	0.0845683	0.0397605	0.0114401	0.0150457	0.0466316	0.0356723	0.0109173	0.00174605	0.0917857	0.208429	0.00710463	0.00256387	0.15972	0.145161	0.0317371	0.0235039	0.136165	0.1269
0.00251189	-2.6	0.0308347	0.0276321	0.00360343	artefact	0.0194725	0.00522876	0.0125726	0.0193106	0.00835499	0.00675255	0.00212993	0.00131752	0.0464416	0.0333559	0.00268643	0.00132521	0.0826677	0.0524781	0.0193379	0.0104523	0.0352254	0.074911
0.00158489	-2.8	0.00386565	0.0121428	0.00518693	0.00910872	0.00485615	0.0192344	0.0014875	0.0129581	0.00255493	0.00292451	0.00176367	0.00379696	0.0159447	0.0159744	0.00574276	0.00340324	0.0115082	0.0122897	0.00252667	0.0134555	0.0310069	0.036924
0.001	-3	0.00428505	artefact	0.00357883	0.00590456	0.0121882	0.00350436	0.00431696	0.00850264	0.00213675	0.0025729	0.0014797	0.00157109	0.00335289	0.00389033	0.00253027	0.000361435	0.00618766	0.00825748	0.00674487	0.00343971	0.00791876	0.0133809
0.000630957	-3.2	0.0037464	0.00104912	0.00220588	0.00406614	0.00449847	0.00323723	0.00342288	0.00642398	0.00330095	0.00087822	0.0036785	0.0016178	0.00784212	0.00551097	0.00220243	0.00400328	0.00124877	0.00316881	0.00271466	0.00472342	0.0100483	0.00775036
0.000398107	-3.4	0.00477477	0.00474517	0.000856164	0.00142285	0.00271485	0.00108293	0.00139587	0.00541185	0.0066411	0.00175682	0.00389586	0.000951746	0.00447193	0.0038693	0.00224536	0.000473934	0.00547345	0.00186846	0.00413064	0.00446075	0.00328293	0.00655708
0.000251189	-3.6	0.00156082	0.013191	0.0111028	0.00066313	0.00831219	0.00654361	0.0010779	0.00589612	0.000278966	0.00111302	0.00158888	0.000378286	0.000553506	0.000453022	0.00162984	8.82768e-05	0.0036071	0.00149254	0.00104756	0.00190712	0.00874271	0.0150754
PTC 0.1 mM		0.25651		0.00504789		0.253805		0.00610582		0.315894		0.00208106		0.302612		0.00477751		0.170114		0.00349653		0.245216
experiment		1	1	1	1	2	2	2	2	3	3	3	3	4	4	4	4	5	5	5	5
méthylmercaptan	log10[ ]	T2R38	T2R38	empty vector	empty vector	T2R38	T2R38	empty vector	empty vector	T2R38	T2R38	empty vector	empty vector	T2R38	T2R38	empty vector	empty vector	T2R38	T2R38	empty vector	empty vector
0.01	-2	0.0591716	0.0944101	0.00362284	0.00145886	0.0905273	0.126419	0.00528841	0.00340042	0.0553259	0.0421433	0.0035743	0.00094162	0.0760775	0.0459921	0.0012053	0.00531701	0.0842012	0.0681413	0.0203234	0.00102373
0.0075	-2.12494	0.0155964	0.0249768	0.0173615	0.00185835	0.0322064	0.0468443	0.00813454	0.00756633	0.0227294	0.0185534	0.00347977	0.00329798	0.0155803	0.0105365	artefact	0.00263277	0.0181448	0.0232864	0.00190725	0.00328916
0.00562341	-2.25	0.00745033	0.00406325	0.0112114	0.000475059	0.0201395	0.014065	0.00950119	0.00503432	0.00889097	0.00920217	0.00315116	0.00229449	0.0280127	0.0295471	0.00438289	0.00456704	0.0299643	0.0094026	0.00180632	0.00204045
0.00439285	-2.35725	0.00872369	0.00255825	0.00183655	0.000657771	0.0105222	0.00968934	0.00639334	0.0109761	0.00809419	0.00865719	0.00512774	0.00299682	artefact	0.00460599	0.00341928	0.00315107	0.00373799	0.0132519	0.00455209	0.00137426
0.00316228	-2.5	0.0061684	0.0170041	0.00340104	0.0109046	0.00614284	0.0102011	0.00436851	0.00732735	0.00566924	0.0067984	0.00670001	0.00112973	0.00372476	0.0033192	0.000803285	0.000939555	0.00556038	0.00227368	0.00110988	0.00214432
0.001	-3	0.0146938	0.00954823	0.00829315	0.00206961	0.00579395	0.00942748	0.00744965	0.00624311	0.000179404	0.00158828	0.00361233	0.00581339	0.00150052	0.00403846	0.00254816	0.00293858	0.00153416	0.00178079	0.0030485	0.00906173
0.000630957	-3.2	0.00535271	0.00290118	0.00711607	0.00668426	0.00963577	0.00622214	0.00507169	0.0107156	0.00110926	0.000690063	0.00367282	0.00489263	0.00293067	0.00313756	0.00238332	0.00147229	0.00270027	0.00266275	0.000621504	0.000823874
PTC 0.1 mM		0.191592		0.00717762		0.385558		0.0054957		0.352648		0.00326998		0.172613		0.00277822		0.302612		0.00477751

## Sheet: S2_fig
	experiment	1	1	2	2	3	3	1	2	3
		T2R38	T2R38	T2R38	T2R38	T2R38	T2R38	empty vector	empty vector	empty vector
PTC (M)	log [PTC] (M)
0.001	-3	0.161778	0.083176	0.100997	0.0744929	0.116453	0.0892471	0.00123044	0.0020016	0.00587669
0.0001	-4	0.16956	0.165244	0.125792	0.131853	0.140406	0.119457	0.00112708	0.00106828	0.000576147
1e-05	-5	0.0929938	0.0868972	0.0520375	0.0577255	0.0827676	0.0332846	0.00263363	0.000702988	0.00113272
3.16456e-06	-5.49969	0.00912134	0.0179818	0.0080937	0.0193258	0.0112042	0.0119185	0.00149165	0.00739426	0.00298122
1e-06	-6	0.00147533	0.00329038	0.00740521	0.0161449	0.00192873	0.0015829	0.00399716	0.00590777	0.0045403
7.66061e-07	-6.11574	0.00415722	0.00936628	0.00938757	0.0057477	not tested	not tested	0.00317835	0.00896191	not tested
5.31987e-07	-6.2741	0.00290223	0.0020859	0.00395396	0.00744485	not tested	not tested	0.00694383	0.00466307	not tested
1e-07	-7	0.00316338	0.000438827	0.00301594	0.00379723	0.000433369	0.0037037	0.00306887	0.00200784	0.00293132

## Sheet: S3_fig
experiment	1	1	2	2
	T2R38	empty vector	T2R38	empty vector
C12HSL (0.1mM in DMSO 0.3%)	0.00197323	8.80592e-05	0.00642832	0.00156904
	0.0145799		0.00927113
PTC 0.1 mM	0.141641	0.00249451	0.10011	0.000172726
	0.208192		0.199905
DMSO 0.3%			0.00693069	9.8464e-05
			0.00464312
experiment	1	1	2	2
	T2R38	empty vector	T2R38	empty vector
C12HSL (0.1mM in DMSO 0.15%)	0.00456932	0.00215255	0.0106832	0.00191902
	0.0151745		0.00388206
PTC 0.1 mM	0.402744	0.00113497	0.328829	0.002414
	0.445242		0.125746
DMSO 0.15%	0.00584946	0.0019524	0.00906344	0.000497018
	0.00692969		0.0100464

## Sheet: S5_fig
	experiment	1	1	2	2	3	3	4	4	5	5
DMSO 1.5%	T2R38 PAV	0.633648	0.602024	0.647952	0.582193	0.781428	0.74725	0.542352	0.574163	0.616883	0.539317
	T2R38 AVI	0.0180875	0.00721419	0.00123514	0.01696	0.0115565	0.0520516	0.00676392	0.016413	0.00136109	0.0118695

## Sheet: S6_fig
experiment	1	1	2	2	3	3
CSP-1 (0.5 mM)	T2R38	empty vector	T2R38	empty vector	T2R38	empty vector
	0.371337	0.485353	0.0320058	1.40814	1.0083	0.982328
		0.017152		1.49804		0.410326
		0.179259		0.0887917		0.200955
		0.269187		0.086269		0.703915
		0.682444		0.0827081
		0.528563		0.136259
		0.254715		0.106831
		0.738444		0.185441
experiment	1	1	2	2	3	3
Agr D1 (0.1mM)	T2R38	empty vector	T2R38	empty vector	T2R38	empty vector
	0.00253692	0.0036855	0.000624164	0.000578035	0.0207636	0.000170634
		0.00087745		0.000645042		0.000279694
		0.00385216				0.0143488
		0.133247				0.0033137
		0.0952091
		0.00740741
		0.00899069
		0.105258

## Sheet: S7_fig
	experiment	1	1	2	2	3	3	4	4	4	4	5	5	5	5
g-butyrolactone	T2R38 PAV	0.130206	0.119637	0.141101	0.114354	0.10979	0.0951735	0.148658	0.123519	not tested	not tested	0.180484	0.196692	not tested	not tested
	T2R38 AVI	0.00128842	0.00147522	0.00160136	0.00208013	0.00187864	0.00394436	0.000477373	0.00222402	not tested	not tested	0.000283447	0.000479065	not tested	not tested
2 méthyl propanal	T2R38 PAV	0.267037	0.162154	0.282782	0.138118	0.0851149	0.14073	not tested	not tested	not tested	not tested	not tested	not tested	not tested	not tested
	T2R38 AVI	0.0103036	0.00995644	0.0204902	0.0141123	0.00830824	0.0115437	not tested	not tested	not tested	not tested	not tested	not tested	not tested	not tested
méthylmercaptan	T2R38 PAV	0.0109279	0.027953	0.0356533	0.0172045	0.0312249	0.0156048	0.0564379	0.0455016	0.0324785	0.034428	0.0836247	0.0626806	0.0635757	0.0478145
	T2R38 AVI	0.00286052	0.00362071	0.0177175	0.00618632	0.012585	0.00597729	0.00172447	0.00165257	0.00549451	0.00185203	0.00235338	0.000264947	0.00510823	0.00150749
diméthyldisulfide	T2R38 PAV	0.0283149	0.0251538	0.0372422	0.073996	0.119963	0.0857561	0.0205473	0.00585195	not tested	not tested	0.179242	0.118	not tested	not tested
	T2R38 AVI	0.01179	0.00462749	0.0135716	0.0127216	0.0132743	0.0109869	0.00098668	0.00184919	not tested	not tested	0.00144984	0.000260485	not tested	not tested
2 pentanone	T2R38 PAV	0.0908004	0.120205	0.151896	0.134494	0.0741026	0.0571043	0.138684	0.130852	not tested	not tested	not tested	not tested	not tested	not tested
	T2R38 AVI	0.00427223	0.00477257	0.00475798	0.00192901	0.000823469	0.00140873	0.0028532	0.0039257	not tested	not tested	not tested	not tested	not tested	not tested
2 butanone	T2R38 PAV	0.0270013	0.105454	0.151007	0.120935	0.0688421	0.0591769	not tested	not tested	not tested	not tested	0.171704	0.129691	not tested	not tested
	T2R38 AVI	0.0069892	0.00604707	0.00163116	0.00018406	0.00393625	0.00960562	not tested	not tested	not tested	not tested	0.00268122	0.00425872	not tested	not tested
Acetone	T2R38 PAV	0.155927	0.180361	0.205251	0.216959	0.0729167	0.149905	not tested	not tested	not tested	not tested	not tested	not tested	not tested	not tested
	T2R38 AVI	0.0055903	0.0133457	0.00330546	0.00694927	0.00443756	0.0082922	not tested	not tested	not tested	not tested	not tested	not tested	not tested	not tested
PTC 0.1 mM	T2R38 PAV	0.292466	not tested	0.24262	not tested	0.170114	not tested	0.226815	not tested	not tested	not tested	0.297031	not tested	not tested	not tested
	empty vector	0.00549779	not tested	0.0051849	not tested	0.00349653	not tested	0.00260127	not tested	not tested	not tested	0.000779698	not tested	not tested	not tested
